## Correction

# Correction: HIV Acquisition Is Associated with Increased Antimicrobial Peptides and Reduced HIV Neutralizing IgA in the Foreskin Prepuce of Uncircumcised Men

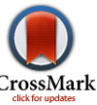

## The *PLOS Pathogens* Staff

The affiliations for the ninth and fifteenth authors are incorrect. Maria J. Wawer and Ronald H. Gray are not affiliated with #1 but with #2 Department of Epidemiology, Johns Hopkins University, Bloomberg School of Public Health, Baltimore, Maryland, United States of America.

## Reference

1. Hirbod T, Kong X, Kigozi G, Ndyababo A, Serwadda D, et al. (2014) HIV Acquisition Is Associated with Increased Antimicrobial Peptides and Reduced HIV Neutralizing IgA in the Foreskin Prepuce of Uncircumcised Men. *PLoS Pathog* 10(10): e1004416. doi:10.1371/journal.ppat.1004416

**Citation:** The *PLOS Pathogens* Staff (2014) Correction: HIV Acquisition Is Associated with Increased Antimicrobial Peptides and Reduced HIV Neutralizing IgA in the Foreskin Prepuce of Uncircumcised Men. *PLoS Pathog* 10(10): e1004515. doi:10.1371/journal.ppat.1004515

**Published:** October 27, 2014

**Copyright:** © 2014 The *PLOS Pathogens* Staff. This is an open-access article distributed under the terms of the Creative Commons Attribution License, which permits unrestricted use, distribution, and reproduction in any medium, provided the original author and source are credited.
